1           Intracranial recordings reveal ubiquitous in-phase and in-  
2           antiphase functional connectivity between homologous brain  
3                                   regions in humans

4                                   Christian O'Reilly\*<sup>a</sup> and Mayada Elsabbagh<sup>a</sup>

5    <sup>a</sup> Montreal Neurological Institute-Hospital, Azrieli Centre for Autism Research, McGill University,  
6                                   Montreal, Canada

7                                   **Corresponding author:**  
8                                   Christian O'Reilly, Ph.D.  
9                                   3775 Rue University, Room C18  
10                                  Duff Medical Building  
11                                  Montréal, Québec, H3A 2B4  
12                                  [christian.oreilly@mcgill.ca](mailto:christian.oreilly@mcgill.ca)  
13                                  1-438-933-3696

## 14 **Abstract**

15 Whether neuronal populations exhibit zero-lag (in-phase or in-antiphase) functional connectivity  
16 is a fundamental question when conceptualizing communication between cell assemblies. It  
17 also has profound implications on how we assess such interactions. Given that the brain is a  
18 delayed network due to the finite conduction velocity of the electrical impulses traveling across  
19 its fibers, the existence of zero-lag functional connectivity may be considered improbable.  
20 However, in this study, using intracranial recordings we demonstrate that most inter-  
21 hemispheric connectivity between homologous cerebral regions is zero-lagged and that this  
22 type of connectivity is ubiquitous. Volume conduction can be safely discarded as a confounding  
23 factor since it is known to drop almost completely within short inter-electrode distances (< 20  
24 mm) in intracranial recordings. This finding should guide future electrophysiological connectivity  
25 studies and highlight the importance of considering the role of zero-lag connectivity in our  
26 understanding of communication between cell assemblies.

## 27 **Introduction**

28 The human brain is among the most complex networks known to humanity. It is estimated to  
29 comprise about 86 billion neurons (Azevedo et al., 2009), supported by as many glial cells  
30 (Azevedo et al., 2009; von Bartheld et al., 2016) and a sophisticated vasculature mesh. In the  
31 neocortex alone, neurons are interconnected by around 0.15 quadrillion synapses (Pakkenberg  
32 et al., 2003). Interactions within this vast network are enabled by mechanisms operating at  
33 distinct spatial and temporal scales. For example, while subcellular exchanges such as synaptic  
34 firing occur within milliseconds, other mechanisms like plasticity may involve days-long neural  
35 reorganization across broad cortical regions (Bassett and Sporns, 2017; Betzel and Bassett,  
36 2017). Our understanding of these phenomena depends on our ability to measure brain activity  
37 across a spectrum of spatio-temporal scales.

38 The electroencephalography (EEG) provides a time-resolved macroscopic correlate of cerebral  
39 activity. It can be recorded when synchronous discharges of spatially aligned populations of  
40 neurons, like the pyramidal cells, generate a cumulative electrical field that propagates by  
41 *volume conduction* from its source all the way to the scalp, where it can be picked up using  
42 surface electrodes. Unfortunately, the same volume conduction that makes EEG possible has  
43 been shown to be a major confounder for functional connectivity based on EEG (Nunez et al.,  
44 1997).

45 Unfolding this paradoxical role of volume conduction requires taking a closer look at the concept  
46 of EEG functional connectivity. Electrophysiological connectivity is generally considered a  
47 correlate of functional interaction due to saltatory conduction (i.e., the transmission of  
48 information through action potentials) propagated to single electrodes by short-range volume  
49 conduction. Ideally, there would be no long-range volume-conducted potentials reaching more

50 than one electrode and no parallel means of communication, such as ephaptic coupling  
51 (Anastassiou et al., 2011) (i.e., modulation of neuronal computation by volume-conducted  
52 electrical fields). However, this ideal hangs on a very delicate trade-off between two opposite  
53 requirements; the neuronal activity must encompass a cell population sufficiently large to  
54 produce a measurable voltage deflection, while at the same time be sufficiently spatially-  
55 retrained as to not overlap with regions covered by the other electrodes.

56 Moreover, the concept of functional connectivity, and the way it is reflected in EEG signals,  
57 shifts gradually across spatial scales. At a small scale, local connectivity is reflected directly in  
58 EEG amplitude since it depends on the synchronous activation of large neuronal populations.  
59 As we move to a larger scale, the connectivity can no longer be measured on a single EEG  
60 lead, but it rather relies on statistical dependence (e.g., coherence) between pairs of EEG  
61 signals generated by overlapping mixtures of neuronal sources. This overlap diminishes  
62 gradually as the scale — or equivalently the inter-electrode distance — becomes larger up to  
63 the point where volume conduction fully dissipates. In EEG, this distance is relatively large; for  
64 example, coherence measures have been determined to be significantly impacted by volume  
65 conduction for pairs of electrodes separated by at least up to 100 mm (Srinivasan et al., 1998).  
66 For smaller distances, an undetermined proportion of the statistical dependence is due to  
67 volume conduction from common neuronal sources rather than connectivity.

68 To overcome this severe limitation, neuronal communication based on action potentials needs  
69 to be distinguished from spurious dependencies due to volume conduction. Using the  
70 quasistatic approximation of Maxwell's equations, volume conduction has been shown to  
71 propagate instantaneously for EEG (Plonsey and Heppner, 1967) and is therefore known to be  
72 a sufficient, but not a necessary, condition for in-phase EEG activity between distant locations

73 on the scalp. Such in-phase synchronization has consequently often been downplayed as an  
74 artifact of volume conduction. For example, studies relying only on the *imaginary part of*  
75 *coherency* (Nolte et al., 2004) or the *phase lag index* (Stam et al., 2007), discard *by-design* any  
76 non-lagged activity between pairs of channels, regardless of whether it is an artifact or the result  
77 of genuine functional connectivity synchronized with no lag. This contrasts sharply with  
78 fundamental (Varela et al., 2001), experimental (Campo et al., 2019; Gray et al., 1989;  
79 Roelfsema et al., 1997), and modeling studies (Dalla Porta et al., 2019; Vicente et al., 2008;  
80 Viriyopase et al., 2012) supporting the existence of zero-lag neuronal connectivity.

81 Therefore, despite being treated as an artifact of volume conduction, zero-lag connectivity may  
82 be an important yet neglected mechanism underlying neural network communication. To  
83 investigate this possibility, we turned to intracranial recording (Frauscher et al., 2018), which is  
84 sensitive to volume-conducted activity from much smaller regions (< 20 mm; (T. H. Bullock et  
85 al., 1995; T H Bullock et al., 1995; Nunez et al., 1997)) than EEG (< 100 mm; (Srinivasan et al.,  
86 1998)) due to the greater proximity between electrodes and neuronal sources. By introducing a  
87 one-sample offset between intracranial signals, we evaluated the proportion of zero-lag  
88 connectivity that is discarded from the standard PLI measure in electrodes distant enough (> 35  
89 mm) not to share common volume-conducted sources. In doing so, we uncover reliable and  
90 ubiquitous zero-lag connectivity – both in-phase and in-antiphase – between homologous  
91 cortical regions.

## 92 **Results**

### 93 **Homologous brain regions exhibit ubiquitous zero-lag connectivity**

94 We measured functional connectivity in intracranial recordings from 106 patients (54 males;  
95 mean age of 33.1 +/- 10.8 years) undergoing pre-surgical testing for drug-resistant

96 epilepsy (Frauscher et al., 2018); see methods for details). Namely, we computed PLI between  
97 every pair of electrodes in every subject, with and without an offset between the signals (offset-  
98 PLI and standard PLI, respectively).

99 Since PLI is known to be biased (i.e., it is systematically larger than zero even in absence of  
100 true connectivity), we computed a baseline corresponding to the chance level using a  
101 “surrogate” dataset. This surrogate dataset was obtained by randomly selecting a subset of 200  
102 channels and computing PLI for every pair not belonging to the same patient (surrogate-PLI). As  
103 shown in Figure 1.a, there is a bias of approximately 0.1 for PLI computed on 1-second epochs  
104 irrespective of the frequency. Thus, we debiased any further PLI estimates by subtracting mean  
105 surrogate-PLI value (mean  $\pm$  sd:  $0.102 \pm 0.013$ ;  $N=78,303$ ).

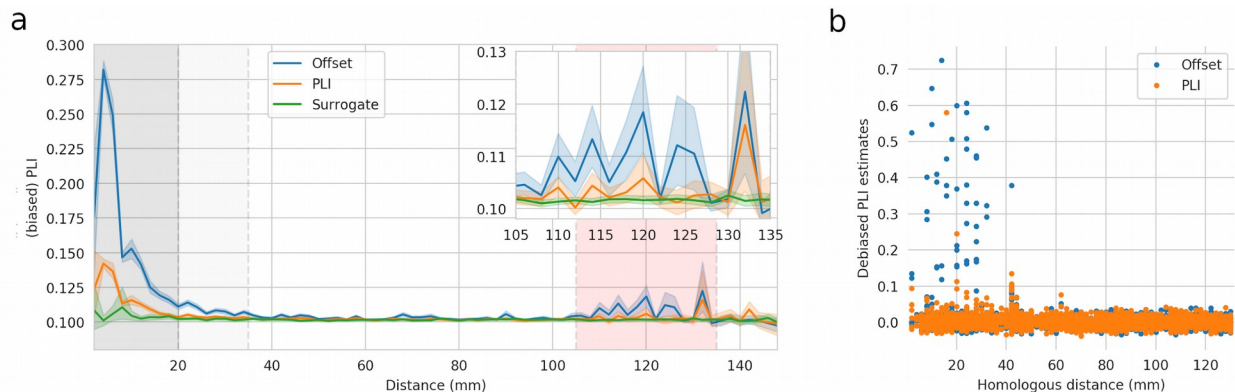

106 **Figure 1. Standard and offset-PLI connectivity between pairs of channels. a) PLI values**  
107 **with respect to inter-electrode distances for the standard PLI definition (PLI; orange), the**  
108 **one-sample offset-PLI (offset; blue), and the PLI computed on surrogate data (surrogate;**  
109 **green). Shaded regions around the lines indicate the 95% confidence interval, computed**  
110 **using bootstrapping. The dark gray region delimits the range of distances for which we**  
111 **expect the presence of volume conduction. The pale gray region delineates a “safety**  
112 **margin” in which we do not interpret the connectivity results because of the possibility**

113 **that some effect of volume conduction remains. The pink region delimits a range of**  
114 **distances for which significant connectivity is observed and for which we are confident**  
115 **that there cannot be any volume conduction artifact for intracranial recordings. We refer**  
116 **to the distances within this range as *target distances* since they are the focus of our**  
117 **subsequent analyses. The inset shows a close view of the PLI for the target distances. b)**  
118 **Offset (blue) and standard PLI (orange) for pairs of electrodes within the target distance**  
119 **range plotted against their homologous distance (see text for the definition).**

120 Zero-lag connectivity for results within the dark grey region (inter-electrode distance < 20 mm)  
121 of Figure 1.a are likely heavily inflated by volume conduction. The offset-PLI is still significantly  
122 different from the surrogate-PLI estimates up to around 35 mm. Although at such distances  
123 volume conduction should not have a major effect, any difference between surrogate-PLI and  
124 offset-PLI values is debatable. In contrast, we observe offset-PLI significantly above surrogate-  
125 PLI values within an approximate range of 105 to 135 mm (shown as a pink area in Figure 1.a),  
126 which is clearly far beyond the reach of volume conduction in intracranial recordings. As  
127 opposed to offset-PLI, estimated standard PLI are barely larger than surrogate-PLI within this  
128 target range with confidence intervals generally overlapping with surrogate-PLI estimates (see  
129 inset in Figure 1.a), clearly demonstrating that most of the significant long-range connectivity is  
130 happening without any lag.

131 Having demonstrated significant zero-lag long-range connectivity, we further investigated the  
132 possibility that it may reflect interhemispheric connections between homologous regions. We  
133 focused on within-subject electrode pairs separated by distances that fall within the 105 and 135  
134 mm range. For these pairs, we computed their *homologous distance*, defined as the distance  
135 between two channels if the left hemisphere was mirrored over the right hemisphere. In

136 practice, since the mediolateral axis is centered on the interhemispheric fissure, this distance is  
137 obtained by using the absolute value of the channel coordinates along this axis.

138 Figure 1.b shows the relationship between the homologous distance and the standard PLI  
139 (orange) and offset-PLI (blue) values. It distinctly shows that all strong long-distance  
140 connections are established between channels with very short homologous distances. Further,  
141 all 46 channel pairs separated by distances falling within our target range and showing a  
142 debiased offset-PLI greater than 0.1 were from homologous regions. By contrast, such  
143 *homologous pairs* (i.e., channel pairs from homologous regions) constitute only 7.6%  
144 (N=228/2992) of the pairs with offset-PLI values smaller than 0.1. Among all homologous pairs,  
145 16.8% (N=46/274) were showing debiased offset-PLI values of more than 0.1, whereas this  
146 ratio is 0% (N=0/2764) for non-homologous pairs. For the same electrode pairs, only six showed  
147 standard debiased PLI above 0.1, confirming our previous conclusion that most of the  
148 interhemispheric connectivity is happening at zero-lag. All of these six pairs were between  
149 homologous regions.

150 Highly connected pairs were observed in seven out of nine patients implanted with electrodes in  
151 homologous regions (see Table 1). The two remaining subjects had very few homologous pairs  
152 (3 and 4 pairs respectively). This large proportion of homologous pairs highly connected with  
153 zero-lag is surprising considering that they were obtained from only 60-second-long recordings  
154 of spontaneous activity, per subject and vigilance state.



155 **Table 1. Number of homologous pairs per subject, number of these pairs that have an offset-PLI >**  
156 **0.1, and their relative proportion in percentage.**

| <b>Subject</b> | <b>Homologous pairs</b> | <b>Offset-PLI &gt; .1</b> | <b>Proportion (%)</b> |
|----------------|-------------------------|---------------------------|-----------------------|
| 29             | 30                      | 9                         | 30.0%                 |
| 40             | 9                       | 6                         | 66.7%                 |
| 69             | 4                       | 2                         | 50.0%                 |
| 75             | 3                       | 0                         | 0.0%                  |
| 84             | 92                      | 10                        | 10.9%                 |
| 88             | 104                     | 9                         | 8.7%                  |
| 89             | 4                       | 0                         | 0.0%                  |
| 94             | 12                      | 6                         | 50.0%                 |
| 106            | 16                      | 4                         | 25.0%                 |

157 **Zero-lag connectivity often involves amplitude inversion**

158 The first 2.5 seconds of activity is shown in Figure 2.a for three typical homologous pairs with an  
159 offset-PLI > 0.1. The overlaid signals are tightly synchronized without any phase lag, but  
160 amplitude-inverted across the two hemispheres. This is equivalent to saying that these pairs of  
161 signals are synchronized in antiphase since amplitude inversion is mathematically equivalent to  
162 a 180-degree phase-shift for oscillatory signals. Further, since PLI estimates account only for  
163 phase synchronization, irrespective of amplitude differences, any in-phase and amplitude  
164 inverted (eq. in-antiphase) synchronization between two signals is discarded by PLI estimates.  
165 Therefore, zero-lag connectivity uncovered by comparing offset-PLI with standard PLI estimates  
166 should be understood as connectivity between signals shifted by any integer multiple of 180  
167 degrees, including zero degrees.

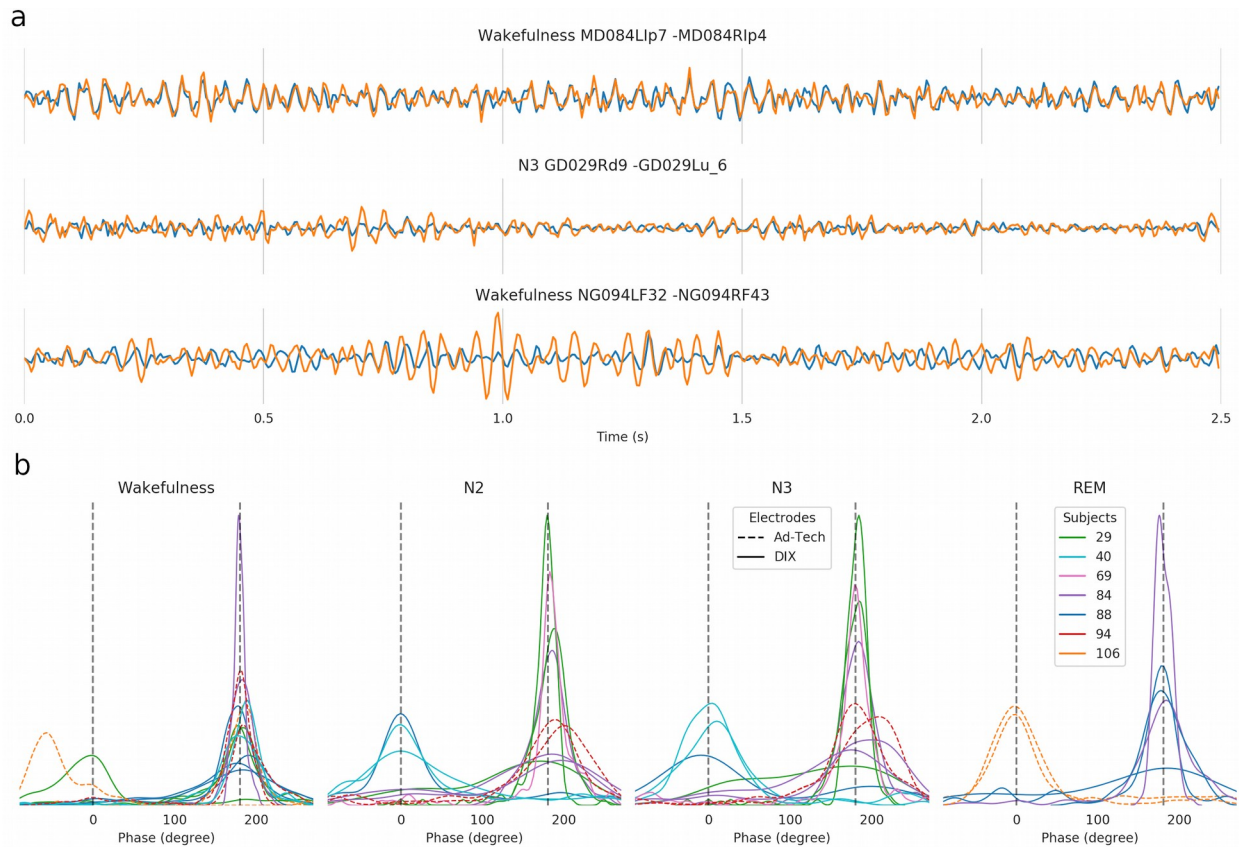

168 **Figure 2. Amplitude inversion (eq. 180-degree phase-shifts) in zero-lag connectivity. a)**  
169 **First 2.5 seconds of signals from three pairs of channels from homologous regions that**  
170 **are highly connected with zero-lag connectivity. The title above these three plots**  
171 **identifies the vigilance state and the two channels being plotted. The minus sign in front**  
172 **of the name of the second channel indicates amplitude inversion. b) Distribution of**  
173 **phase differences for all homologous pairs with debiased offset-PLI > 0.1. REM: Rapid**  
174 **eye movement sleep; N2 and N3: Second and third stages of non-REM sleep.**

175 To illustrate the proportion of synchrony at zero (in-phase) versus 180 degrees (in-antiphase),  
176 we plotted the distribution of the phase difference between homologous pairs with offset-PLI >  
177 0.1 (Figure 2.b). The presence of well-defined peaks at either 0 or 180 degrees for most pairs  
178 strongly confirms our findings of zero-lag connectivity. Although peaks can be observed at both

179 phase-shifts, there are significantly more peaks (78%, Table 2) at 180 degrees vs. 0 degrees ( $p$   
180 =  $2.0 \times 10^{-5}$ ; testing against the Bernoulli distribution under the null hypothesis that the dominant  
181 phase is equally likely to be at 0 or 180 degrees). Although this test is not exact given that the  
182 46 electrode pairs include repeated measurements on subjects and channels, the dominance of  
183 the 180-degree offset appears robust since it is observed across all vigilance states and  
184 channel types. This was also the case in most subjects (5/7) showing significant zero-lag  
185 connectivity in homologous pairs, where the percentages of 180-degree phase-shift dominance  
186 are 100%, 100%, 100%, 89%, 78%, 33%, and 25% respectively. Due to a large effect size  
187 (Cohen's  $d=0.83$ ; (Cohen, 1988), the predominance of the 180-degree phase-shift is statistically  
188 significant across subjects ( $t=2.03$ ;  $p=0.044$ ; one-tail one-sample  $t$ -test, compared against  
189  $\mu=50\%$ ) even with this small sample size ( $N=7$ ).

190 **Table 2. The number of homologous pairs with significant zero-lag connectivity that are either**  
191 **dominated by a 0 or a 180 degrees phase-shift, per vigilance state, and electrode type.**

| State        | Electrode | 0 degree  | 180 degree | Percentage |
|--------------|-----------|-----------|------------|------------|
| N2           | DIXI      | 3         | 7          | 70%        |
|              | Ad-Tech   | 0         | 2          | 100%       |
| N3           | DIXI      | 3         | 7          | 70%        |
|              | Ad-Tech   | 0         | 2          | 100%       |
| REM          | DIXI      | 0         | 5          | 100%       |
|              | Ad-Tech   | 2         | 0          | 0%         |
| Wakefulness  | DIXI      | 1         | 10         | 91%        |
|              | Ad-Tech   | 1         | 3          | 75%        |
| <b>Total</b> |           | <b>10</b> | <b>36</b>  | <b>78%</b> |

## 192 **Zero-lag connectivity is independent of physiological and recording conditions**

193 We examined the extent to which zero-lag connectivity is modulated by anatomical or  
194 physiological factors, namely, brain region, vigilance state, frequency band, and recording  
195 electrode type. Among the 46 pairs that showed significant (i.e., offset-PLI > 0.1) non-lagged

196 connectivity, 37 were from the temporal lobe, eight were frontal, and one was parietal. This  
197 corresponds to 16.2% (15/229), 19.5% (8/41), and 25.0% (1/4) of all homologous pairs for these  
198 three regions, respectively. We also observed similar proportions of homologous pairs with non-  
199 lagged connectivity across vigilance state: rapid eye movement sleep (REM) sleep (12.1%;  
200 7/58), non-REM stage 2 (N2) sleep (16.9%; 12/71), non-REM stage 3 (N3) sleep (16.9%;  
201 12/71), and wakefulness (20.3%; 15/74). Regarding the electrode type, all homologous pairs  
202 involved the same type of electrodes in both hemispheres, and these types were either DIXI  
203 electrodes (90%; 246/274) or Ad-Tech subdural strips and grids (10%; 28/274). For the subset  
204 of pairs with offset-PLI > 0.1, these percentages were equal to 78% (36/46) and 22% (10/46),  
205 respectively.

206 Kruskal-Wallis non-parametric one-way ANOVAs showed no significant effect of lobes or  
207 vigilance states on debiased offset-PLI values in homologous pairs of electrodes. However, we  
208 found a significant effect of brain regions ( $H=29.1$ ;  $p\text{-values}=5.9e-5$ ). This is due only to pairs  
209 within the Planum Temporale. When data from this region are excluded, the region effect  
210 becomes non-significant. Most pairs in the Planum Temporal have a high offset-PLI (see Figure  
211 3.a). However, detailed examination (see the full table of pairs with offset-PLI > 0.1 in  
212 Supplementary Table 1) shows that only two subjects are implanted bilaterally in the Planum  
213 Temporale and that the higher values come from only one of these subjects. We also found a  
214 significant effect of the electrode type ( $H=6.52$ ;  $p\text{-values}=0.011$ ; see distributions in Figure 3.b).  
215 However, since both types of electrodes are well represented in the homologous pairs with  
216 offset-PLI > 0.1, we can rule out the possibility that zero-lag inter-hemispheric connectivity is  
217 linked to a specific type of electrode.

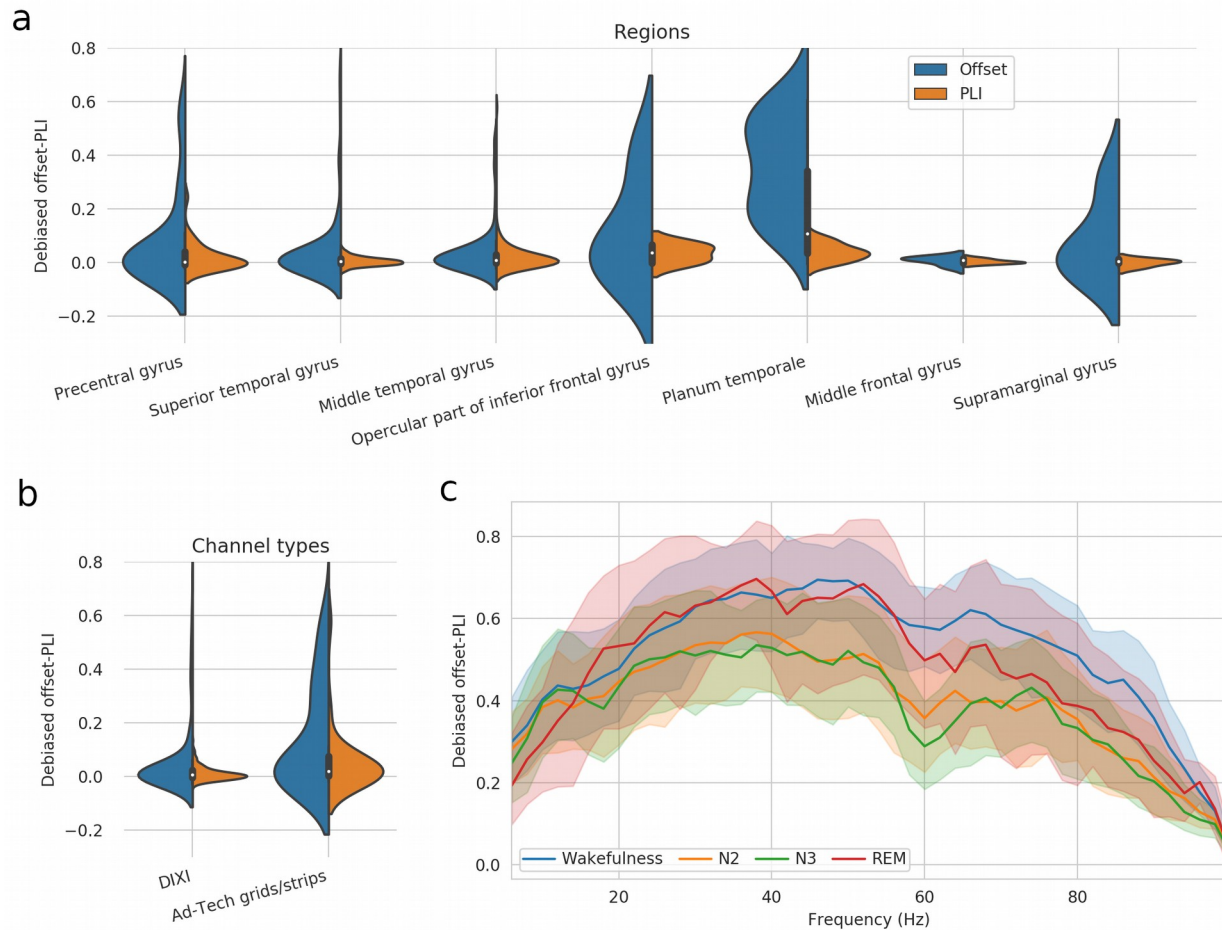

218 **Figure 3. Modulation of zero-lag connectivity by physiological or experimental factors.**  
 219 **a,b) Distribution of debiased PLI and offset-PLI values between homologous channels for**  
 220 **the different brain regions (a) and electrode types (b). c) Variation of the debiased offset-**  
 221 **PLI with frequency. PLI values are averaged, per vigilance state, across the homologous**  
 222 **pairs with overall debiased offset-PLI > 0.1.**

223 Averaged offset-PLI computed per 2 Hz frequency bands for the set of channel pairs with  
 224 debiased offset-PLI > 0.1 show that the zero-lag synchronization is broadband (see Figure 3.c;  
 225 single curves, for all 46 pairs, are also provided in Supplementary Figure 2), reflecting that large  
 226 populations of neurons can fire synchronously across brain regions following non-sinusoidal  
 227 patterns.

228 **Discussion**

229 **Potential roles of zero-lag connectivity**

230 Using intracranial recordings, we demonstrated ubiquitous zero-lag connectivity between  
231 homologous brain regions, which was three times more often in antiphase than in phase. It is  
232 well known that the sign of local field potentials and current source densities can alternate  
233 depending on the laminar depth within a given cortical column (Schaefer et al., 2015). Thus, it is  
234 possible that some amplitude inversions we observed are due to electrodes recording in  
235 homologous regions at different cortical depths. Nevertheless, this is unlikely to explain the  
236 relatively high and robust predominance of in-antiphase synchronization observed in our data.

237 A mechanism of competition/reciprocal-inhibition is likely to be involved in the observed  
238 antiphase synchronization. Previous studies using transcranial magnetic stimulation have  
239 identified a similar pattern of interhemispheric inhibition over the primary motor area (Ferber et  
240 al., 1992; Perez and Cohen, 2009). However, to our knowledge, this is the first time phase-  
241 synchrony is reported for spontaneous interhemispheric inhibition. The observation that such  
242 inhibition happens in most cases with a synchronous phase furthers our understanding of the  
243 mechanisms involved in interhemispheric inhibition.

244 Regarding in-phase connectivity, synchronized activity between two brain regions, resulting  
245 from generalized depolarization at the population level, creates a common window of  
246 heightened responsiveness. Therefore, it can be hypothesized that such a window promotes  
247 information integration between these distant regions.

248 Zero-lag connectivity may also be involved in supporting the brain's predictive capacity. The

249 brain is a delayed network due to the finite conduction velocity of the electrical impulses  
250 traveling across its fibers. In such a network, the apparent paradox of zero-lag (instantaneous)  
251 connectivity can be resolved through rhythmic entrainment supported by feedback in closed-  
252 loop systems. By capturing the rhythm by which a phenomenon of interest occurs (i.e., rate  
253 coding), neuronal populations can synchronize their activity with expected external or internal  
254 cues, allowing anticipation and better response time. Therefore, such synchrony would occur  
255 bilaterally for any process requiring operations performed either in both hemispheres at the  
256 same time, or potentially in a different hemisphere at the same time, depending on the context  
257 (e.g., the laterality of a stimulus).

#### 258 **Implications for functional connectivity in EEG**

259 Our findings of ubiquitous zero-lag connectivity between homologous brain regions have  
260 important implications for the measurement of functional connectivity using EEG. Traditional  
261 solutions to deal with the confounding effects of volume conduction include studying only long-  
262 range connections (e.g., considering only pairs of electrodes separated by more than 10 cm in a  
263 coherence study; (Srinivasan et al., 1998) or discarding any zero-lag connectivity (e.g., using  
264 the imaginary part of coherency or the PLI; (Nolte et al., 2004; Stam et al., 2007). In contrast,  
265 our findings clearly demonstrate the importance of zero-lag connectivity, indicating that the  
266 confounding effect of volume conduction needs to be controlled for without systematically  
267 discarding zero-lag connectivity. Instead, functional connectivity studies using EEG should  
268 adopt strategies to un-mix cortical sources such as independent component analysis (Delorme  
269 et al., 2012) or source reconstruction (Baillet et al., 2001), or use model-based approaches such  
270 as dynamic causal modeling (Kiebel et al., 2009). The latter approach may be argued to be  
271 more powerful; with adequate modeling, it could take into account other factors that are  
272 currently neglected, such as ephaptic coupling or long-distance neurochemical mediation.

## 273 **Conclusion**

274 In this study, we found ubiquitous in-phase and in-antiphase connectivity between homologous  
275 regions of the brain. This zero-lag activity was highly specific to homologous pairs of channels,  
276 which rules out any possibility that this observation is due the method confounders such as  
277 volume conductions spreading on unexpectedly long distances or correlations induced by  
278 improper use of reference electrodes since any of these factors would affect equally  
279 homologous and non-homologous regions. These results have important implications in our  
280 understanding of functional connectivity. Our findings demonstrate the preponderance of zero-  
281 lag connectivity and suggest that it probably serves fundamental mechanisms relevant to the  
282 integration and interpretation of input across distinct brain regions. In light of these results, it is  
283 clear that such synchronous activity should not be excluded from EEG connectivity analyses as  
284 an artifact.

## 285 **Methods**

### 286 **Intracranial recording dataset**

287 For this study, we used an open-access dataset of intracranial recordings (Frauscher et al.,  
288 2018) including 1772 channels recorded in 106 patients (54 males; mean age of 33.1 +/- 10.8  
289 years) who were candidates for surgical treatment of drug-resistant epilepsy. Included channels  
290 were from brain regions considered “very likely to be healthy” by a consensus of two  
291 epileptologists. For each channel, an artifact-free segment of 60 seconds was recorded in an  
292 eyes-closed resting state, in rapid eye movement (REM) sleep, and in the second (N2) and third  
293 (N3) stages of non-REM sleep. Electrode positions are provided in stereotaxic space. Full  
294 description of inclusion criteria, signal preprocessing, and atlas co-registration are available in  
295 the original publication(Frauscher et al., 2018).



## 296 **Connectivity assessment**

297 To assess connectivity, we used the phase lag index (PLI) defined as follow (Ortiz et al., 2012;  
298 Stam et al., 2007):

$$299 \quad PLI = \left| E \left[ \text{sign} \left( \text{Im} \left( S_{xy} \right) \right) \right] \right| \quad (1)$$

300 with  $S_{xy}$  representing the cross-spectrum and  $E[x]$  denoting the expected value of  $x$ , which in  
301 practice is estimated by averaging across epochs. This measure assesses the degree to which  
302 the phases of two signals are locked in time. Importantly, it is defined such that all zero-lag  
303 activity (i.e., oscillatory activity with no phase difference) is explicitly canceled-out. Note that the  
304 zero-lag cancelation is not sensitive to differences in amplitude, and therefore, to amplitude  
305 inversion. This implies that phase lags of 180 degrees are also discarded from estimated  
306 connectivity. Consequently, we qualify as “zero-lag connectivity” any connectivity involving a  
307 phase difference that is an integer multiple of 180 degrees.

308 PLI is known to be a biased estimator of functional brain connectivity (Vinck et al., 2011). This is  
309 the case for most metric of functional connectivity since most of them are bound between 0.0  
310 and 1.0 and will, therefore, have an average value greater than 0.0 on a random dataset. In our  
311 analyses, we estimated this bias by computing PLI on a surrogate dataset obtained by randomly  
312 pairing signals from different subjects. The mean value of this surrogate PLI has been removed  
313 from raw PLI estimates to obtain debiased PLI values.

314 We further compare the values of two PLI estimates, the standard (debiased) PLI measure and  
315 a second measure that we refer to as (debiased) offset-PLI. This second measure is computed  
316 exactly like the first one, with the only difference being that one of the two signals has been  
317 offset by a single time sample, allowing us to recover the zero-lag activity that was canceled-out

318 by the first measure. Our intracranial signals being sampled at 200 Hz, this corresponds to a 5  
319 ms offset. The average magnitude of the connectivity at this delay can be shown not to be  
320 significantly different from other similar delays (e.g., 10 or 15 ms; see Supplementary Figure  
321 1.a). Consequently, the portion of the connectivity that is not recovered by the offset-PLI due to  
322 the cancelation of the 5 ms-lagged connectivity is relatively negligible. This contrasts with the  
323 very significant loss of PLI connectivity when ignoring zero-lag correlations, as shown in  
324 Supplementary Figure 1.a by the very sharp and narrow drop in PLI values at zero-lag. Although  
325 PLI is not linearly decomposable by time-delays, the difference between PLI and offset-PLI  
326 values can serve as a proxy for zero-lag connectivity in electrode pairs separated by distances  
327 larger than the range of volume conduction.

### 328 **Phase differences**

329 The distribution of phase differences ( $\Delta(\phi)$ ) between pairs of channels is determined by  
330 computing the angle from a polar representation of the cross-spectral density estimated using  
331 Welch's averaged periodogram method (Welch, 1967). The dominant peak phase discriminator  
332 ( $\phi_d$ ) indicating whether the dominant peak is at 0 or 180 degrees was evaluated using:

$$333 \quad \phi_d = \log_{10}(\Delta(180)/\Delta(0)) \quad (2)$$

334 With this definition, a value of 1 indicates a phase distribution 10 times larger at a phase of 180  
335 degrees than at 0 degrees, whereas a value of -1 indicates the opposite.

### 336 **Software**

337 All analyses, including PLI computation, have been performed in Python 3.7.7 using MNE  
338 0.20.dev0 and the standard Python libraries for signal processing, statistical analysis, and data  
339 visualization (Numpy 1.18.2, Scipy 1.4.1, Pandas 1.0.1, Matplotlib 3.1.2, Seaborn 0.9.0).

340 **Data and code availability**

341 The intracranial EEG database is available at <https://mni-open-ieegatlas.research.mcgill.ca>. The  
342 code used for the analysis is accessible by sending a request to the corresponding author.  
343 Scripts will be provided as is, without restriction. It will also be deposited on the GitHub account  
344 of the corresponding author ([https://github.com/christian-oreilly/intracranial\\_paper](https://github.com/christian-oreilly/intracranial_paper)) upon  
345 acceptance of this manuscript.

346 **Acknowledgments**

347 This research is supported by the Azrieli Centre for Autism Research (ACAR). The authors  
348 would like to thank Samantha Wunderlich for proofreading this manuscript.

349 **Author Contributions**

350 C.O.R.: Conceptualization, data analysis, writing of the first manuscript draft, revision of the  
351 manuscript.  
352 M.E.: Revision of the manuscript.

353 **Declaration of Interests**

354 Both authors report having no conflict of interests with respect to the content of this manuscript.

355 **References**

- 356 Anastassiou CA, Perin R, Markram H, Koch C. 2011. Ephaptic coupling of cortical neurons. *Nat*  
357 *Neurosci* **14**:217–223. doi:10.1038/nn.2727
- 358 Azevedo FAC, Carvalho LRB, Grinberg LT, Farfel JM, Ferretti REL, Leite REP, Jacob Filho W,  
359 Lent R, Herculano-Houzel S. 2009. Equal numbers of neuronal and nonneuronal cells  
360 make the human brain an isometrically scaled-up primate brain. *J Comp Neurol*

- 361           **513**:532–541. doi:10.1002/cne.21974
- 362   Baillet S, Moshier JC, Leahy RM. 2001. Electromagnetic brain mapping. *IEEE Signal Process*
- 363           *Mag* **18**:14–30. doi:10.1109/79.962275
- 364   Bassett DS, Sporns O. 2017. Network neuroscience. *Nat Neurosci* **20**:353–364.
- 365           doi:10.1038/nn.4502
- 366   Betzler RF, Bassett DS. 2017. Multi-scale brain networks. *NeuroImage, Functional Architecture*
- 367           of the Brain **160**:73–83. doi:10.1016/j.neuroimage.2016.11.006
- 368   Bullock T. H., McClune MC, Achimowicz JZ, Iragui-Madoz VJ, Duckrow RB, Spencer SS. 1995.
- 369           EEG coherence has structure in the millimeter domain: subdural and hippocampal
- 370           recordings from epileptic patients. *Electroencephalogr Clin Neurophysiol* **95**:161–177.
- 371           doi:10.1016/0013-4694(95)93347-A
- 372   Bullock T H, McClune MC, Achimowicz JZ, Iragui-Madoz VJ, Duckrow RB, Spencer SS. 1995.
- 373           Temporal fluctuations in coherence of brain waves. *Proc Natl Acad Sci U S A* **92**:11568–
- 374           11572.
- 375   Campo AT, Vázquez Y, Álvarez M, Zainos A, Rossi-Pool R, Deco G, Romo R. 2019. Feed-
- 376           forward information and zero-lag synchronization in the sensory thalamocortical circuit
- 377           are modulated during stimulus perception. *Proc Natl Acad Sci* **116**:7513–7522.
- 378           doi:10.1073/pnas.1819095116
- 379   Cohen J. 1988. *Statistical power analysis for the behavioral sciences*, 2nd ed. ed. Hillsdale,
- 380           N.J.: L. Erlbaum Associates.
- 381   Dalla Porta L, Matias FS, dos Santos AJ, Alonso A, Carelli PV, Copelli M, Mirasso CR. 2019.
- 382           Exploring the Phase-Locking Mechanisms Yielding Delayed and Anticipated
- 383           Synchronization in Neuronal Circuits. *Front Syst Neurosci* **13**.
- 384           doi:10.3389/fnsys.2019.00041
- 385   Delorme A, Palmer J, Onton J, Oostenveld R, Makeig S. 2012. Independent EEG Sources Are

- 386 Dipolar. *PLOS ONE* **7**:e30135. doi:10.1371/journal.pone.0030135
- 387 Ferbert A, Priori A, Rothwell JC, Day BL, Colebatch JG, Marsden CD. 1992. Interhemispheric  
388 inhibition of the human motor cortex. *J Physiol* **453**:525–546.  
389 doi:10.1113/jphysiol.1992.sp019243
- 390 Frauscher B, von Ellenrieder N, Zelmann R, Doležalová I, Minotti L, Olivier A, Hall J, Hoffmann  
391 D, Nguyen DK, Kahane P, Dubeau F, Gotman J. 2018. Atlas of the normal intracranial  
392 electroencephalogram: neurophysiological awake activity in different cortical areas.  
393 *Brain* **141**:1130–1144. doi:10.1093/brain/awy035
- 394 Gray CM, König P, Engel AK, Singer W. 1989. Oscillatory responses in cat visual cortex exhibit  
395 inter-columnar synchronization which reflects global stimulus properties. *Nature*  
396 **338**:334–337. doi:10.1038/338334a0
- 397 Kiebel SJ, Garrido MI, Moran R, Chen C-C, Friston KJ. 2009. Dynamic causal modeling for EEG  
398 and MEG. *Hum Brain Mapp* **30**:1866–1876. doi:10.1002/hbm.20775
- 399 Nolte G, Bai O, Wheaton L, Mari Z, Vorbach S, Hallett M. 2004. Identifying true brain interaction  
400 from EEG data using the imaginary part of coherency. *Clin Neurophysiol Off J Int Fed*  
401 *Clin Neurophysiol* **115**:2292–2307. doi:10.1016/j.clinph.2004.04.029
- 402 Nunez PL, Srinivasan R, Westdorp AF, Wijesinghe RS, Tucker DM, Silberstein RB, Cadusch  
403 PJ. 1997. EEG coherency. I: Statistics, reference electrode, volume conduction,  
404 Laplacians, cortical imaging, and interpretation at multiple scales. *Electroencephalogr*  
405 *Clin Neurophysiol* **103**:499–515. doi:10.1016/s0013-4694(97)00066-7
- 406 Ortiz E, Stingl K, Münßinger J, Braun C, Preissl H, Belardinelli P. 2012. Weighted Phase Lag  
407 Index and Graph Analysis: Preliminary Investigation of Functional Connectivity during  
408 Resting State in Children. *Comput Math Methods Med* **2012**. doi:10.1155/2012/186353
- 409 Pakkenberg B, Pelvig D, Marner L, Bundgaard MJ, Gundersen HJG, Nyengaard JR, Regeur L.  
410 2003. Aging and the human neocortex. *Exp Gerontol* **38**:95–99. doi:10.1016/s0531-

- 411 5565(02)00151-1
- 412 Perez MA, Cohen LG. 2009. Interhemispheric inhibition between primary motor cortices: what  
413 have we learned? *J Physiol* **587**:725–726. doi:10.1113/jphysiol.2008.166926
- 414 Plonsey R, Heppner DB. 1967. Considerations of quasi-stationarity in electrophysiological  
415 systems. *Bull Math Biophys* **29**:657–664. doi:10.1007/BF02476917
- 416 Roelfsema PR, Engel AK, König P, Singer W. 1997. Visuomotor integration is associated with  
417 zero time-lag synchronization among cortical areas. *Nature* **385**:157–161.  
418 doi:10.1038/385157a0
- 419 Schaefer MK, Hechavarría JC, Kössl M. 2015. Quantification of mid and late evoked sinks in  
420 laminar current source density profiles of columns in the primary auditory cortex. *Front*  
421 *Neural Circuits* **9**:52. doi:10.3389/fncir.2015.00052
- 422 Srinivasan R, Nunez PL, Silberstein RB. 1998. Spatial filtering and neocortical dynamics:  
423 estimates of EEG coherence. *IEEE Trans Biomed Eng* **45**:814–826.  
424 doi:10.1109/10.686789
- 425 Stam CJ, Nolte G, Daffertshofer A. 2007. Phase lag index: assessment of functional  
426 connectivity from multi channel EEG and MEG with diminished bias from common  
427 sources. *Hum Brain Mapp* **28**:1178–1193. doi:10.1002/hbm.20346
- 428 Varela F, Lachaux JP, Rodriguez E, Martinerie J. 2001. The brainweb: phase synchronization  
429 and large-scale integration. *Nat Rev Neurosci* **2**:229–239. doi:10.1038/35067550
- 430 Vicente R, Gollo LL, Mirasso CR, Fischer I, Pipa G. 2008. Dynamical relaying can yield zero  
431 time lag neuronal synchrony despite long conduction delays. *Proc Natl Acad Sci U S A*  
432 **105**:17157–17162. doi:10.1073/pnas.0809353105
- 433 Vinck M, Oostenveld R, van Wingerden M, Battaglia F, Pennartz CMA. 2011. An improved  
434 index of phase-synchronization for electrophysiological data in the presence of volume-  
435 conduction, noise and sample-size bias. *NeuroImage* **55**:1548–1565.

436           doi:10.1016/j.neuroimage.2011.01.055

437 Viriyopase A, Bojak I, Zeitler M, Gielen S. 2012. When Long-Range Zero-Lag Synchronization is

438           Feasible in Cortical Networks. *Front Comput Neurosci* **6**. doi:10.3389/fncom.2012.00049

439 von Bartheld CS, Bahney J, Herculano-Houzel S. 2016. The Search for True Numbers of

440           Neurons and Glial Cells in the Human Brain: A Review of 150 Years of Cell Counting. *J*

441           *Comp Neurol* **524**:3865–3895. doi:10.1002/cne.24040

442 Welch P. 1967. The use of fast Fourier transform for the estimation of power spectra: A method

443           based on time averaging over short, modified periodograms. *IEEE Trans Audio*

444           *Electroacoustics* **15**:70–73. doi:10.1109/TAU.1967.1161901

## 445 **Supplemental information**

### 446 **Effect of delays and epoch durations on offset-PLI**

447 Supplementary Figure 1 shows averaged offset-PLI values for the four different vigilance states  
448 at various delays. To ensure that interpretation of these figures is not confounded by volume  
449 conduction, they have been produced using only pairs of electrodes separated by at least 35  
450 mm and we included only pairs for which the overall debiased offset-PLI was larger than 0.1.  
451 Each time step corresponds to a 5 ms offset, given our recording sample at 200 Hz. Note that  
452 the values at step=0 correspond by definition to the standard PLI. Panels a and b show offset-  
453 PLI computed using 1 s and 5 s epochs, respectively. The same scale has been used for these  
454 two panels to highlight the effect of epoch duration on PLI computation. Not only the bias is very  
455 much impacted (not visible on this figure using debiased offset-PLI;  $0.225 \pm 0.014$  (mean  $\pm$  sd)  
456 for 5s epochs as compared to  $0.102 \pm 0.013$  for 1s epochs), but even debiased offset-PLI takes  
457 very different values. The average values of offset-PLI vary smoothly with respect to the number  
458 of time steps, except for step=0. On the one hand, the smoothness for steps different from zero  
459 supports that most connectivity is preserved when computing PLI at an arbitrary offset close to  
460 zero. On the other hand, the sharp drop at step=0 shows the importance of zero-lag  
461 connectivity, even for channel pairs that are not expected to be sensitive to volume conduction.

### 462 **Explanation of the effect of the epoch duration**

463 We observe that the duration of the epochs has a significant difference on the rate at which the  
464 offset-PLI values decrease with increasing offsets (Supplementary Figure 1.a,b). In order to  
465 explain this relationship, we propose a model where we first penalize the connectivity by a factor  
466  $\epsilon$  equal to the ratio of the offset to the epoch duration:

$$467 \quad \epsilon = \frac{|d|}{w_l f_s} \quad (1)$$



468 where  $d$  and  $w_i$  are the offset and the epoch length in sample numbers and  $f_s$  is the sampling  
469 frequency. This penalty accounts for reduced bleeding of the offset-PLI zero-lag cancellation  
470 within neighboring frequencies in larger epochs due to a consequent increase in spectral  
471 resolution. Panels (d) and (e) of Supplementary Figure 1 show that the pattern of canceled  
472 frequencies at different delays remains the same for these two epoch durations, but for shorter  
473 epochs, it is more blended and smoothed. Panel (f) overlay the variation of PLI by frequencies  
474 for different offsets, whereas panel (g) enlarges a small segment of these curves for the case  
475 with an offset of 20 time samples (100 ms). The sharpness of the troughs at *frequencies where*  
476 *PLI discards zero-lag connectivity*<sup>1</sup> (shown by vertical dashed lines) is clear for the 5 s epochs.  
477 By contrast, for the 1 s epochs, the zero-lag connectivity cancelation at two neighboring  
478 frequencies (e.g., 20 and 25 Hz on panel (g)) bleeds onto larger frequency intervals resulting in  
479 a very sharp and more heavily attenuated intermediate peak (e.g., at around 22.5 Hz on panel  
480 (g)). For larger epochs, the resulting higher frequency sampling is associated with smaller  
481 frequency intervals over which connectivity is canceled-out, resulting in a slower decrease of the  
482 offset-PLI as the offset increases.

483 While this increased attenuation due to reduced spectral resolution may account for most of the  
484 differences observed for offset-PLI across different epoch sizes, it does not account for the  
485 curved aspects of these relationships. Thus, we further scaled the  $\epsilon$  penalty by a weight  $w(|d|)$   
486 proportional to the square root of the area under the  $1/f^\beta$  aperiodic spectral component,  
487 normalized to unity and integrated from the inverse of the offset up to half the sampling

24 1 For a given offset  $\Delta$ , the expression “*frequencies where PLI discards zero-lag connectivity*” can be  
25 understood as frequencies where the zero-lag connectivity is canceled-out both at offset=0 and offset= $\Delta$ .  
26 For example, with an offset of two time steps (a period of 10 ms), the activity that was zero-lagged at 50  
27 Hz with offset=0 ms is again zero-lagged with offset=10 ms since the signal has been shifted by exactly  
28 half a cycle (i.e., 180 degrees) from its original phase.

487 frequency (i.e., the Nyquist frequency):

$$488 \quad w(|d|) = \sqrt{\frac{\int_{f_s/2}^{f_s/2} f^{-\beta} df}{\int_0^{f_s/2} f^{-\beta} df}} \quad (2)$$

489 The square root in (2) is used to account for the fact that the  $1/f^\beta$  equation describes the  
490 aperiodic component of the *power* spectrum, which is related to the amplitude by a square  
491 relationship.  $\beta$  was set to 2.29, as previously reported (Frauscher et al., 2018). The  $w(|d|)$  factor  
492 accounts for the fact that higher frequencies are expected to be more severely affected by  
493 smaller delays because these delays constitute a larger fraction of their period. As the offset  
494 increases, we penalize the connectivity more because the offset starts to increasingly affect the  
495 lower frequencies while continuing to affect high frequencies. Finally, we scale the penalty by a  
496 single proportionality constant  $a$  fitted manually to a value of 12 in our analysis. The final  
497 relationship is as follow:

$$498 \quad PLI(d) = 1 - a \epsilon w(|d|) \quad (3)$$

499 Supplementary Figure 1.c shows the variation of offset-PLI with respect to the offset as modeled  
500 with the equation (3), overlaid to the empirical curves shown in panel (a) and (b), but averaged  
501 across states and normalized to their peak. This tentative explanation captures relatively well  
502 the overall behavior displayed by the offset-PLI computed using different epoch durations, using  
503 only one free parameter ( $a$ ).

504

**Supplementary Table 1. Homologous pairs with offset-PLI > 0.1.**

| Subject | Distance | Homologous distance | State | Offset | PLI    | Elec-trode | Lobe     | Region                                   |
|---------|----------|---------------------|-------|--------|--------|------------|----------|------------------------------------------|
| 94      | 120      | 20                  | N2    | 0.212  | 0.113  | G          | Frontal  | Precentral gyrus                         |
| 94      | 126      | 32                  | N2    | 0.292  | 0.049  | G          | Frontal  | Precentral gyrus                         |
| 88      | 110      | 28                  | N2    | 0.330  | 0.030  | D          | Temporal | Middle temporal gyrus                    |
| 69      | 118      | 16                  | N2    | 0.452  | 0.048  | D          | Temporal | Middle temporal gyrus                    |
| 29      | 108      | 24                  | N2    | 0.171  | 0.036  | D          | Temporal | Planum temporale                         |
| 29      | 112      | 24                  | N2    | 0.479  | 0.015  | D          | Temporal | Planum temporale                         |
| 29      | 114      | 24                  | N2    | 0.607  | 0.009  | D          | Temporal | Planum temporale                         |
| 40      | 118      | 2                   | N2    | 0.135  | 0.049  | D          | Temporal | Planum temporale                         |
| 84      | 110      | 12                  | N2    | 0.410  | -0.005 | D          | Temporal | Superior temporal gyrus                  |
| 84      | 118      | 12                  | N2    | 0.152  | 0.055  | D          | Temporal | Superior temporal gyrus                  |
| 40      | 120      | 20                  | N2    | 0.159  | 0.007  | D          | Temporal | Superior temporal gyrus                  |
| 84      | 124      | 14                  | N2    | 0.119  | 0.042  | D          | Temporal | Superior temporal gyrus                  |
| 94      | 120      | 20                  | N3    | 0.201  | 0.093  | G          | Frontal  | Precentral gyrus                         |
| 94      | 126      | 32                  | N3    | 0.323  | 0.068  | G          | Frontal  | Precentral gyrus                         |
| 88      | 110      | 28                  | N3    | 0.266  | 0.063  | D          | Temporal | Middle temporal gyrus                    |
| 69      | 118      | 16                  | N3    | 0.350  | 0.043  | D          | Temporal | Middle temporal gyrus                    |
| 29      | 108      | 24                  | N3    | 0.163  | 0.070  | D          | Temporal | Planum temporale                         |
| 29      | 112      | 24                  | N3    | 0.508  | 0.043  | D          | Temporal | Planum temporale                         |
| 29      | 114      | 24                  | N3    | 0.581  | -0.001 | D          | Temporal | Planum temporale                         |
| 40      | 118      | 2                   | N3    | 0.122  | 0.034  | D          | Temporal | Planum temporale                         |
| 84      | 110      | 12                  | N3    | 0.389  | 0.007  | D          | Temporal | Superior temporal gyrus                  |
| 84      | 118      | 12                  | N3    | 0.154  | 0.013  | D          | Temporal | Superior temporal gyrus                  |
| 40      | 120      | 20                  | N3    | 0.154  | 0.006  | D          | Temporal | Superior temporal gyrus                  |
| 84      | 124      | 14                  | N3    | 0.157  | 0.016  | D          | Temporal | Superior temporal gyrus                  |
| 106     | 106      | 8                   | REM   | 0.403  | 0.061  | G          | Frontal  | Opercular part of inferior frontal gyrus |
| 106     | 120      | 8                   | REM   | 0.307  | 0.006  | G          | Parietal | Supramarginal gyrus                      |
| 88      | 110      | 28                  | REM   | 0.461  | 0.023  | D          | Temporal | Middle temporal gyrus                    |
| 88      | 114      | 42                  | REM   | 0.101  | 0.044  | D          | Temporal | Middle temporal gyrus                    |
| 88      | 120      | 42                  | REM   | 0.379  | -0.014 | D          | Temporal | Middle temporal gyrus                    |
| 84      | 120      | 8                   | REM   | 0.286  | 0.005  | D          | Temporal | Superior temporal gyrus                  |
| 84      | 132      | 10                  | REM   | 0.647  | -0.002 | D          | Temporal | Superior temporal gyrus                  |
| 106     | 112      | 18                  | Wake  | 0.507  | 0.051  | G          | Frontal  | Precentral gyrus                         |
| 94      | 120      | 20                  | Wake  | 0.600  | 0.246  | G          | Frontal  | Precentral gyrus                         |
| 94      | 126      | 32                  | Wake  | 0.538  | 0.026  | G          | Frontal  | Precentral gyrus                         |
| 88      | 106      | 28                  | Wake  | 0.456  | 0.018  | D          | Temporal | Middle temporal gyrus                    |
| 88      | 110      | 28                  | Wake  | 0.168  | 0.005  | D          | Temporal | Middle temporal gyrus                    |
| 88      | 110      | 28                  | Wake  | 0.223  | 0.039  | D          | Temporal | Middle temporal gyrus                    |
| 88      | 114      | 28                  | Wake  | 0.175  | -0.016 | D          | Temporal | Middle temporal gyrus                    |
| 106     | 132      | 16                  | Wake  | 0.379  | 0.581  | G          | Temporal | Middle temporal gyrus                    |
| 29      | 108      | 24                  | Wake  | 0.380  | 0.034  | D          | Temporal | Planum temporale                         |
| 29      | 112      | 24                  | Wake  | 0.330  | -0.006 | D          | Temporal | Planum temporale                         |
| 29      | 114      | 24                  | Wake  | 0.273  | 0.083  | D          | Temporal | Planum temporale                         |
| 40      | 118      | 2                   | Wake  | 0.524  | 0.094  | D          | Temporal | Planum temporale                         |
| 84      | 116      | 10                  | Wake  | 0.548  | -0.005 | D          | Temporal | Superior temporal gyrus                  |
| 40      | 120      | 20                  | Wake  | 0.369  | 0.043  | D          | Temporal | Superior temporal gyrus                  |
| 84      | 124      | 14                  | Wake  | 0.725  | 0.014  | D          | Temporal | Superior temporal gyrus                  |

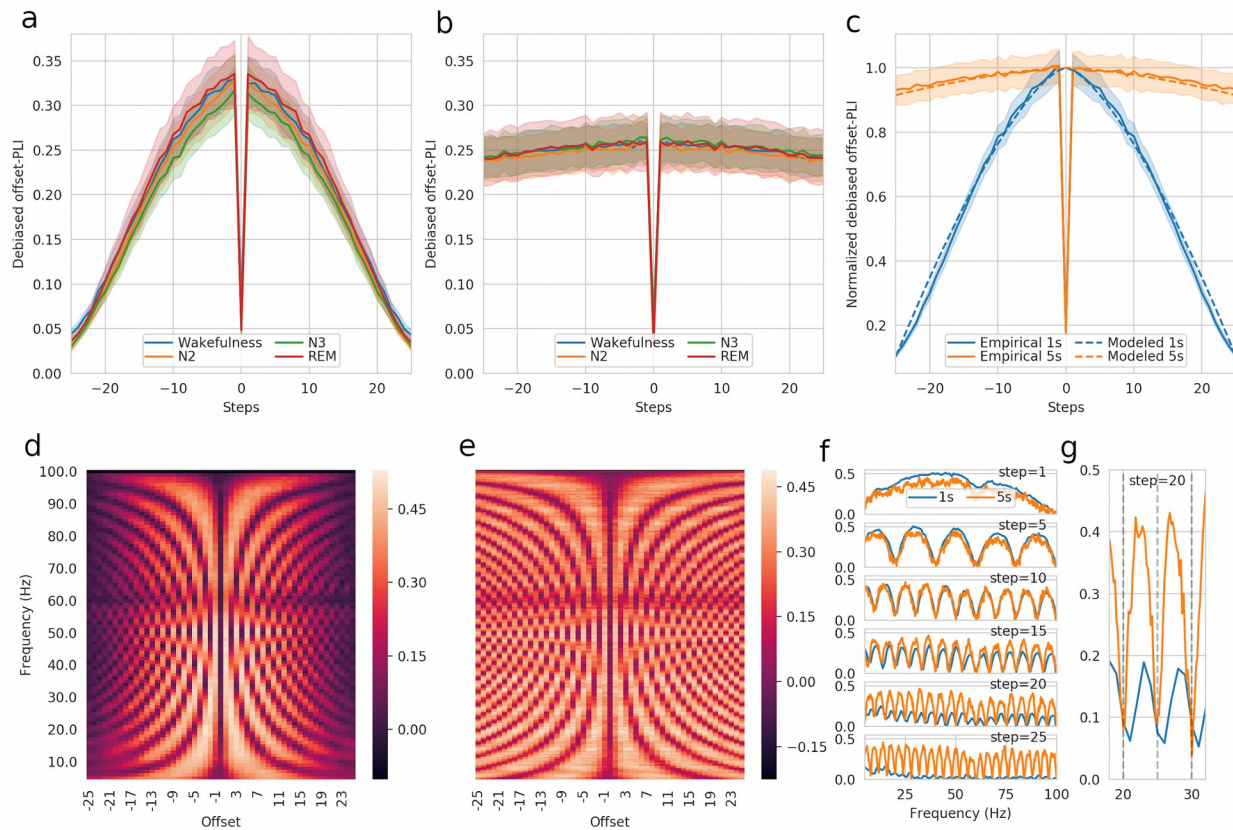

505 **Supplementary Figure 1. Impact of delays and epoch duration on PLI estimates.** a, b) Variation of  
 506 the offset-PLI for different offsets, for 1-s epochs (a) and 5-s epochs (b). c) Curves from panels (a) and (b)  
 507 averaged across states and normalized to unity at their peaks. The relationships modeled using equation  
 508 (3) have also been overlaid to these curves. d, e) Heat maps of offset-PLI values for a range of  
 509 frequencies and offsets, computed using 1 s epochs (d) and 5 s epochs (e). f) Variation of the offset-PLI  
 510 with respect to frequency, at discrete steps (i.e., number of time samples used as offset), overlaid for the  
 511 two epoch lengths. g) A zoomed-in view of the 18-32 Hz range for the offset-PLI at an offset of 20 time  
 512 samples (i.e., 100 ms).

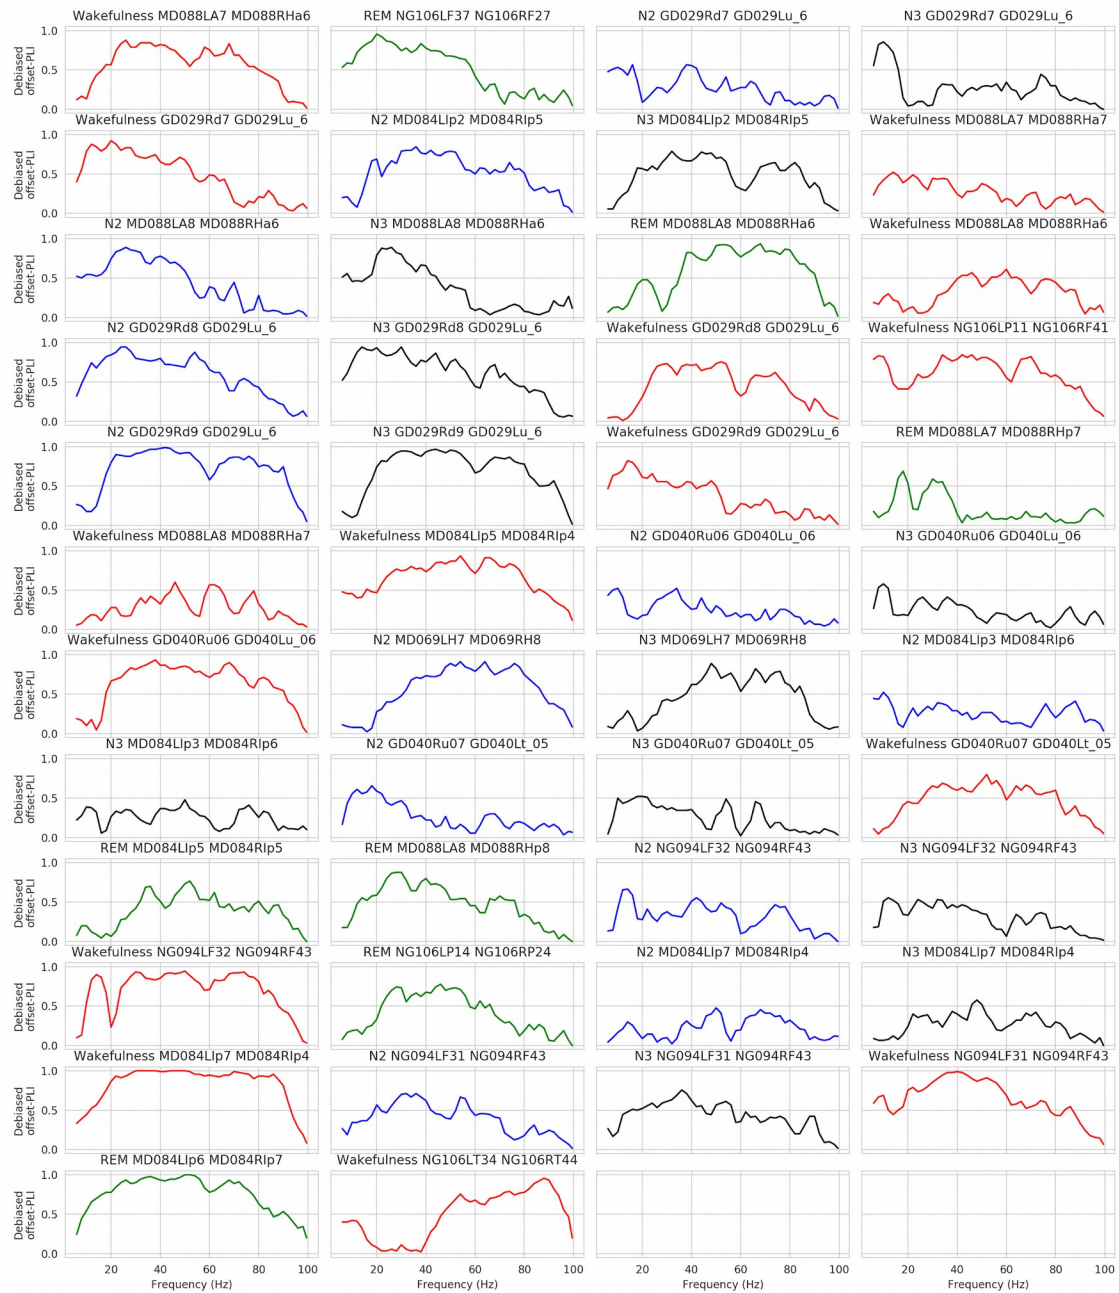

513 **Supplementary Figure 2. Variation of the debiased offset-PLI with respect to frequency for the 46**  
 514 **homologous pairs with a global debiased offset-PLI greater 0.1.** The title over the plots identifies the  
 515 vigilance state and the name of the two channels. The vigilance state is color-coded: red for wakefulness,  
 516 blue for N2, black for N3, and green for REM. The offset-PLI values have been computed on every  
 517 contiguous 2 Hz frequency band.
